# Supplementary material
Source: Springer Nature journal article supplement (https://www.springermedizin.de/resource/supplementary/12889_2011_3184_MOESM1_ESM.PDF/9488330)
Supplement: MOESM1 [file 9488330]

## Additional File 1. Search Strategy

### COCHRANE LIBRARY search strategy

| ID  | Search                                                                                                                                                                                                                            |
|-----|-----------------------------------------------------------------------------------------------------------------------------------------------------------------------------------------------------------------------------------|
| #1  | MeSH descriptor Workplace explode all trees                                                                                                                                                                                       |
| #2  | (#1 OR worksite* OR employee* OR worker* OR corporat* OR employer* OR company*)                                                                                                                                                   |
| #3  | MeSH descriptor Occupational Health explode all trees                                                                                                                                                                             |
| #4  | MeSH descriptor Occupational Health Services explode all trees                                                                                                                                                                    |
| #5  | MeSH descriptor Health Promotion explode all trees                                                                                                                                                                                |
| #6  | MeSH descriptor Primary Prevention explode all trees                                                                                                                                                                              |
| #7  | MeSH descriptor Employee Incentive Plans explode all trees                                                                                                                                                                        |
| #8  | MeSH descriptor Preventive Health Services explode all trees                                                                                                                                                                      |
| #9  | (#3 OR #4 OR #5 OR #6 OR #7 OR #8 OR program* OR "wellness program" OR intervention* OR prevent*)                                                                                                                                 |
| #10 | MeSH descriptor Employee Performance Appraisal explode all trees                                                                                                                                                                  |
| #11 | MeSH descriptor Task Performance and Analysis explode all trees                                                                                                                                                                   |
| #12 | MeSH descriptor Work Capacity Evaluation explode all trees                                                                                                                                                                        |
| #13 | MeSH descriptor Efficiency explode all trees                                                                                                                                                                                      |
| #14 | MeSH descriptor Efficiency, Organizational explode all trees                                                                                                                                                                      |
| #15 | MeSH descriptor Disability Evaluation explode all trees                                                                                                                                                                           |
| #16 | (#10 OR #11 OR #12 OR #13 OR #14 OR #15 OR presenteeism OR "work* limitation*" OR productivity OR "job performance" OR "work* performance" OR "productivity loss" OR disabilit* OR "work* impairment*" OR "impaired performance") |
| #17 | (#2 AND #9 AND #16)                                                                                                                                                                                                               |

### MEDLINE search strategy

("Workplace"[Mesh] OR worksite\* OR employee\* OR worker\* OR corporat\* OR employer\* OR compan\*) AND (((("Occupational Health"[Mesh] OR "Occupational Health Services"[Mesh])) OR "Health Promotion"[Mesh]) OR "Managed Care Programs"[Mesh]) OR ("prevention and control"[Subheading] OR "Primary Prevention"[Mesh]) OR "health program\*" OR "wellness program\*" OR prevention) AND ("Work Capacity Evaluation"[Mesh] OR ("Efficiency"[Mesh] OR "Efficiency, Organizational"[Mesh]) OR presenteeism OR "work\* limitation\*" OR "work\* productivity" OR "job performance" OR "work\* performance" OR "productivity loss" OR "work\* disabilit\*" OR "disability prevention" OR "work\* impairment\*" OR "impaired performance") AND (((((((("Review "[Publication Type] OR "Review Literature as Topic"[Mesh] OR "Peer Review, Research"[Mesh])) OR ("Meta-Analysis "[Publication Type] OR "Meta-Analysis as Topic"[Mesh])) OR ("Randomized Controlled Trial "[Publication Type] OR "Randomized Controlled Trials as Topic"[Mesh] OR "Controlled Clinical Trial "[Publication Type])) OR "Multicenter Studies as Topic"[Mesh]) OR "Cohort Studies"[Mesh]) OR "Controlled Clinical Trials as Topic"[Mesh]) OR ("Evaluation Studies "[Publication Type] OR "Evaluation Studies as Topic"[Mesh]) OR ecological OR pre-post)

## EMBASE search strategy

| ID | Search                                                                                                                                                                                                                                                                                                                                                 |
|----|--------------------------------------------------------------------------------------------------------------------------------------------------------------------------------------------------------------------------------------------------------------------------------------------------------------------------------------------------------|
| #1 | 'employee'/exp OR 'workplace'/exp OR 'worker'/exp OR 'employer'/exp OR worksite* OR corporat* OR compan*                                                                                                                                                                                                                                               |
| #2 | 'occupational health'/exp OR 'occupational health service'/exp OR 'preventive medicine'/exp OR 'health promotion'/exp OR 'prevention and control'/exp OR 'education program'/exp OR 'health program'/exp OR wellness OR intervention OR program                                                                                                        |
| #3 | 'work capacity'/exp OR 'productivity'/exp OR 'personnel management'/exp OR 'task performance'/exp OR 'job performance'/exp OR 'work disability'/exp OR efficien* OR 'employee performance' OR presenteeism OR 'work limitation' OR 'work performance' OR 'productivity loss' OR 'disability prevention' OR 'work impairment' OR 'impaired performance' |
| #4 | 'systematic review'/exp OR 'meta analysis'/exp OR 'randomized controlled trial'/exp OR 'cohort analysis'/exp OR ecological OR 'pre post'                                                                                                                                                                                                               |
| #5 | (#1 AND #2 AND #3 AND #4)                                                                                                                                                                                                                                                                                                                              |

## CINAHL PLUS search strategy

| ID  | Search                                                                                                                                                                                                                                    |
|-----|-------------------------------------------------------------------------------------------------------------------------------------------------------------------------------------------------------------------------------------------|
| S1  | (MH "Work Environment+")                                                                                                                                                                                                                  |
| S2  | (MH "Corporations+")                                                                                                                                                                                                                      |
| S3  | (MH "Workforce")                                                                                                                                                                                                                          |
| S4  | S1 or S2 or S3                                                                                                                                                                                                                            |
| S5  | S1 or S2 or S3 or workplace* or worksite* or worker* or employee*<br>or employer* or compan*                                                                                                                                              |
| S6  | (MH "Occupational Health Services+")                                                                                                                                                                                                      |
| S7  | (MH "Employee Assistance Programs")                                                                                                                                                                                                       |
| S8  | (MH "Employee Incentive Programs")                                                                                                                                                                                                        |
| S9  | (MH "Occupational Health+")                                                                                                                                                                                                               |
| S10 | (MH "Health Services+")                                                                                                                                                                                                                   |
| S11 | (MH "Health Promotion+")                                                                                                                                                                                                                  |
| S12 | (MH "Preventive Health Care+")                                                                                                                                                                                                            |
| S13 | (MH "Diet Therapy+")                                                                                                                                                                                                                      |
| S14 | (MH "Disability Management")                                                                                                                                                                                                              |
| S15 | (MH "Health Education+")                                                                                                                                                                                                                  |
| S16 | (MH "Stress Management")                                                                                                                                                                                                                  |
| S17 | (MH "Smoking Cessation Programs")                                                                                                                                                                                                         |
| S18 | (MH "Weight Reduction Programs")                                                                                                                                                                                                          |
| S19 | (MH "Health Screening+")                                                                                                                                                                                                                  |
| S20 | (MH "Alternative Therapies+")                                                                                                                                                                                                             |
| S21 | S6 or S7 or S8 or S9 or S10 or S11 or S12 or S13 or S14 or S15 or S16<br>or S17 or S18 or S19 or S20                                                                                                                                      |
| S22 | S6 or S7 or S8 or S9 or S10 or S11 or S12 or S13 or S14 or S15 or S16<br>or S17 or S18 or S19 or S20 or "wellness program*" or prevention                                                                                                 |
| S23 | (MH "Employee Performance Appraisal+")                                                                                                                                                                                                    |
| S24 | (MH "Job Performance")                                                                                                                                                                                                                    |
| S25 | (MH "Productivity")                                                                                                                                                                                                                       |
| S26 | S23 or S24 or S25                                                                                                                                                                                                                         |
| S27 | S23 or S24 or S25 or presenteeism or "work* limitation*" or "work*<br>productivity" or "work* performance" or "productivity loss" or "work*<br>disabilit*" or "disability prevention" or "work* impairment*" or<br>"impaired performance" |
| S28 | (MH "Systematic Review") or (MH "Cochrane Library")                                                                                                                                                                                       |
| S29 | (MH "Meta Analysis")                                                                                                                                                                                                                      |
| S30 | (MH "Clinical Trials+")                                                                                                                                                                                                                   |
| S31 | (MH "Concurrent Prospective Studies") or (MH "Prospective Studies+")<br>or (MH "Nonconcurrent Prospective Studies")                                                                                                                       |
| S32 | S28 or S29 or S30 or S31                                                                                                                                                                                                                  |
| S33 | S28 or S29 or S30 or S31 or cohort or ecological or pre-post                                                                                                                                                                              |
| S34 | S5 and S22 and S27 and S33                                                                                                                                                                                                                |

## NLM GATEWAY search strategy

| ID | Search                                                                                                                                                                                                                                                                                                                                                                                                            |
|----|-------------------------------------------------------------------------------------------------------------------------------------------------------------------------------------------------------------------------------------------------------------------------------------------------------------------------------------------------------------------------------------------------------------------|
| #1 | Workplace[MESH] OR worksite OR employee OR worker OR Corporate OR company OR corporation Limit: English, 1990:2010                                                                                                                                                                                                                                                                                                |
| #2 | Occupational Health[MESH] OR Occupational Health Services[MESH] OR Health Promotion[MESH] OR prevention & control[SH] OR Primary Prevention MESH] OR Employee Incentive Plans[MESH] OR Managed Care Programs[MESH] OR "health program" OR "wellness program" Limit: English, 1990:2010                                                                                                                            |
| #3 | Employee Performance Appraisal[MESH] OR Work Capacity Evaluation[MESH] OR Efficiency[MESH] OR presenteeism OR "work limitation" OR productivity OR Task Performance and Analysis [MESH] OR "job performance" OR "work performance" OR "productivity loss" OR Disability Evaluation[MESH] OR "work disability" OR "disability prevention" OR "work impairment" OR "impaired performance" Limit: English, 1990:2010 |
| #4 | Review Literature as Topic[MESH] OR Meta-Analysis as Topic[MESH] OR Controlled Clinical Trials as Topic[MESH] OR Cohort Studies [MESH] OR ecological OR pre-post OR "systematic review"                                                                                                                                                                                                                           |
| #5 | #1 AND #2 AND #3 AND #4                                                                                                                                                                                                                                                                                                                                                                                           |

## EVIDENCE IN HEALTH AND SOCIAL CARE search strategy

(workplace\* OR worksite\* OR employee\* OR worker\* OR corporat\* OR compan\*) AND ("occupational health" OR "occupational health services" OR "health promotion" OR prevention OR program OR "wellness program" OR intervention) AND (presenteeism OR "work\* limitation\*" OR impair\* OR "work\* productivity" OR efficiency OR "job performance" OR "work\* performance" OR "productivity loss" OR "work\* disability" OR "disability prevention" OR "work\* impairment\*" OR "impaired performance") AND ("systematic review" OR "meta analysis" OR "randomized controlled clinical trial" OR cohort OR ecological OR pre-post)

## **PsychINFO** search strategy

1. exp Personnel/
2. exp Business Organizations/
3. (workplace\* or worksite\* or employee\* or worker\* or corporat\* or employer\* or compan\*).mp.  
[mp=title, abstract, heading word, table of contents, key concepts]
4. 1 or 2 or 3
5. exp "Industrial and Organizational Psychology"/ or exp Health Promotion/
6. exp Prevention/ or exp Professional Consultation/ or exp Public Health Services/
7. exp Health Education/
8. exp Educational Programs/ or exp Nutrition/ or exp Physical Education/
9. exp Preventive Medicine/
10. exp Mental Health Programs/
11. exp Well Being/ or exp Employee Assistance Programs/ or exp Holistic Health/ or exp Occupational Therapy/
12. ("occupational health" or wellness or program or intervention).mp. [mp=title, abstract, heading word, table of contents, key concepts]
13. 5 or 6 or 7 or 8 or 9 or 10 or 11 or 12
14. exp Personnel Evaluation/ or exp Job Performance/ or exp Employee Productivity/ or exp Employee Efficiency/
15. exp Disability Evaluation/ or exp Ability Level/
16. exp Monetary Incentives/ or exp Incentives/
17. 13 or 16
18. 14 or 15
19. (presenteeism or "work\* limitation\*" or "productivity loss" or "work\* disabilit\*" or "disability prevention" or "work\* impairment\*").mp. [mp=title, abstract, heading word, table of contents, key concepts]
20. 18 or 19
21. exp Treatment Effectiveness Evaluation/ or exp "Literature Review"/
22. exp Meta Analysis/
23. exp Cohort Analysis/
24. ("randomized controlled trial\*" or ecological or pre-post).mp. [mp=title, abstract, heading word, table of contents, key concepts]
25. systematic review.mp. [mp=title, abstract, heading word, table of contents, key concepts]
26. 21 or 22 or 23 or 24 or 25
27. 4 and 17 and 20 and 26

## AMED search strategy

| ID  | Search                                                                                                                                                                                                                           |
|-----|----------------------------------------------------------------------------------------------------------------------------------------------------------------------------------------------------------------------------------|
| S1  | (DE "WORKPLACE")                                                                                                                                                                                                                 |
| S2  | (DE "EMPLOYERS")                                                                                                                                                                                                                 |
| S3  | S1 or S2                                                                                                                                                                                                                         |
| S4  | S1 or S2 or worksite* or employee* or worker* or corporat*<br>or compan*                                                                                                                                                         |
| S5  | (DE "OCCUPATIONAL HEALTH")                                                                                                                                                                                                       |
| S6  | (DE "OCCUPATIONAL HEALTH SERVICES")                                                                                                                                                                                              |
| S7  | (DE "HEALTH PROMOTION") OR (DE "HEALTH SERVICES")                                                                                                                                                                                |
| S8  | (DE "PREVENTION") OR (DE "PREVENTIVE HEALTH CARE")<br>OR (DE "PREVENTIVE HEALTH SERVICES")                                                                                                                                       |
| S9  | S5 or S6 or S7 or S8                                                                                                                                                                                                             |
| S10 | S5 or S6 or S7 or S8 or "health program*" or "wellness program"                                                                                                                                                                  |
| S11 | (DE "WORK CAPACITY EVALUATION")                                                                                                                                                                                                  |
| S12 | (DE "EFFICIENCY")                                                                                                                                                                                                                |
| S13 | (DE "DISABILITYEVALUATION")                                                                                                                                                                                                      |
| S14 | S11 or S12 or S13                                                                                                                                                                                                                |
| S15 | S11 or S12 or S13 or presenteeism or "work* limitation*" or "work*<br>productivity" or "job performance" or "work* performance" or<br>"productivity loss" or "work* disability" or "work* impairment*" or "impaired performance" |
| S16 | (DE "META ANALYSIS")                                                                                                                                                                                                             |
| S17 | (DE "RANDOMIZED CONTROLLED TRIALS")                                                                                                                                                                                              |
| S18 | S16 or S17                                                                                                                                                                                                                       |
| S19 | S16 or S17 or "systematic review*" or cohort or prospective or<br>evaluation or ecological or pre-post                                                                                                                           |
| S20 | S4 and S10 and S15 and S19                                                                                                                                                                                                       |
